# Supplementary material for: Ab initio molecular dynamics simulation of vibrational energy redistribution of selective excitation of C–H stretching vibrations for solid nitromethane
Source: Royal Society of Chemistry journal article supplement (doi:10.1039/c9cp03797g), 2019-01-01
Supplement: c9cp03797g1.pdf [file c9cp03797g1.pdf]

# Supporting Information for Ab initio Molecular Dynamics Simulation of Vibrational Energy Redistribution of Selective Excitation of C–H Stretching Vibrations for Solid Nitromethane

Meilin Lu,<sup>†,‡,¶</sup> Zhaoyang Zheng,<sup>‡,¶</sup> Gangbei Zhu,<sup>‡</sup> Guoyang Yu,<sup>‡</sup> Yunfei Song,<sup>‡</sup>  
Yanqiang Yang<sup>\*,‡</sup>

<sup>†</sup>Department of Physics, Harbin Institute of Technology, Harbin 150001, China

<sup>‡</sup>National Key Laboratory of Shock Wave and Detonation Physics, Institute of Fluid  
Physics, China Academy of Engineering Physics, Mianyang 621900, China

## Corresponding Author

\* Email: yqyang@caep.cn (Y.Q.Y.)

## Author Contributions

<sup>¶</sup> Meilin Lu and Zhaoyang Zheng contributed equally to this work.

Table S1. Vibrational frequencies (in  $\text{cm}^{-1}$ ) of internal and external modes of solid nitromethane.

Figure S1. Graphical depictions of the 14 intramolecular vibrations.

Figure S2. SED spectra between 11 and 12 ps of intramolecular mode after exciting mode 74 (C-H symmetric stretching).

Figure S3. SED spectra between 11 and 12 ps of intramolecular mode after exciting mode 80 (C-H asymmetric stretching).

Figure S4. SED spectra between 11 and 12 ps of intramolecular mode after exciting mode 84 (C-H asymmetric stretching).

Figure S5. SED spectra in 12 ps of intramolecular mode at 100 K without selective excitation.

Figure S6. Evolution of kinetic energy for intramolecular mode M1 ( $\nu_{\text{as}}(\text{CH}_3)$ ) after exciting mode 84 (C-H asymmetric stretching).

Figure S7. SED spectra of intramolecular mode M1 ( $\nu_{\text{as}}(\text{CH}_3)$ ) for the first 1 ps after exciting mode 84 (C-H asymmetric stretching).



### Strong coupling and weak coupling

In this work, the strong coupling and weak coupling between the normal modes were defined by the SED spectra. For example, Figure S1, S2 and S3 exhibit the SED spectra for the 14 intramolecular modes obtained from STFT of their normal-mode momentum ranging from 11 to 12 ps after excitation of mode 74, 80, and 84, respectively. According to the SED in these spectra, the mode itself is always in the order of 0.1 a.u.. To generally distinguish the coupling modes, the concomitant coupling modes which could be more than  $1.0 \times 10^{-3}$  a.u. are defined as strong coupling (mainly under the second excitation), and those always in the order of  $1.0 \times 10^{-4}$  a.u. are defined as weak coupling.

Table S1. Vibrational frequencies (in  $\text{cm}^{-1}$ ) of internal and external modes of solid nitromethane. All quantities are calculated at the respective theoretical equilibrium volume using PBE-D3 functional. Here A(R), B1(R+IR), B2(R+IR) and B3(R+IR) are irreducible representations of space group  $P2_12_12_1$ , and A1(R+IR), A2(R+IR), B1(R+IR) and B2(R+IR) are irreducible representation of point group  $C_{2v}$ . Note that anharmonic frequencies are obtained from Fourier transformation of kinetic energy of normal modes.

| Crystalline nitromethane ( $P2_12_12_1$ ) |                    |                      |                            |                          | Molecular nitromethane ( $C_{2v}$ ) <sup>a</sup> |                            |                                             |
|-------------------------------------------|--------------------|----------------------|----------------------------|--------------------------|--------------------------------------------------|----------------------------|---------------------------------------------|
| No.                                       | Harmonic frequency | Anharmonic frequency | Irreducible representation | Assignment               | Mode                                             | Irreducible representation | Assignment (notion)                         |
| 4                                         | 52.2               | 56                   | B2                         | CH <sub>3</sub> rotation | M15                                              | A2                         | CH <sub>3</sub> torsion $\tau(\text{NO}_2)$ |
| 5                                         | 54.3               | 61                   | B1                         |                          |                                                  |                            |                                             |
| 6                                         | 54.8               | 56                   | A                          |                          |                                                  |                            |                                             |
| 7                                         | 61.5               | 61                   | B3                         |                          |                                                  |                            |                                             |
| 8                                         | 71.9               | 74                   | A                          | --                       | --                                               | --                         | --                                          |
| 9                                         | 73.5               | 74                   | B2                         | --                       | --                                               | --                         | --                                          |
| 10                                        | 76.1               | 74                   | B1                         | --                       | --                                               | --                         | --                                          |
| 11                                        | 76.2               | 74                   | A                          | --                       | --                                               | --                         | --                                          |
| 12                                        | 79.5               | 76                   | B1                         | --                       | --                                               | --                         | --                                          |
| 13                                        | 88.1               | 84                   | A                          | --                       | --                                               | --                         | --                                          |
| 14                                        | 93.1               | 91                   | B2                         | --                       | --                                               | --                         | --                                          |
| 15                                        | 94.1               | 89                   | B3                         | --                       | --                                               | --                         | --                                          |
| 16                                        | 102.8              | 102                  | B3                         | --                       | --                                               | --                         | --                                          |
| 17                                        | 108.8              | 107                  | B1                         | --                       | --                                               | --                         | --                                          |
| 18                                        | 108.9              | 107                  | A                          | --                       | --                                               | --                         | --                                          |
| 19                                        | 111.6              | 114                  | B3                         | --                       | --                                               | --                         | --                                          |
| 20                                        | 115.0              | 114                  | B2                         | --                       | --                                               | --                         | --                                          |
| 21                                        | 117.2              | 114                  | B3                         | --                       | --                                               | --                         | --                                          |
| 22                                        | 118.4              | 117                  | B1                         | --                       | --                                               | --                         | --                                          |
| 23                                        | 124.3              | 117                  | B2                         | --                       | --                                               | --                         | --                                          |
| 24                                        | 129.3              | 130                  | A                          | --                       | --                                               | --                         | --                                          |

Continued.

| Crystalline nitromethane ( $P2_12_12_1$ ) |                    |                      |                            |                                                                       | Molecular nitromethane ( $C_{2v}$ ) |                            |                                                              |
|-------------------------------------------|--------------------|----------------------|----------------------------|-----------------------------------------------------------------------|-------------------------------------|----------------------------|--------------------------------------------------------------|
| No.                                       | Harmonic frequency | Anharmonic frequency | Irreducible representation | Assignment                                                            | Mode                                | Irreducible representation | Assignment                                                   |
| 25                                        | 140.7              | 135                  | A                          | --                                                                    | --                                  | --                         | --                                                           |
| 26                                        | 145.5              | 142                  | B3                         | --                                                                    | --                                  | --                         | --                                                           |
| 27                                        | 150.5              | 147                  | B2                         | --                                                                    | --                                  | --                         | --                                                           |
| 28                                        | 152.4              | 150                  | B1                         | --                                                                    | --                                  | --                         | --                                                           |
| 29                                        | 477.8              | 478                  | B1                         | NO <sub>2</sub> rocking                                               | M14                                 | B1                         | NO <sub>2</sub> rocking $\rho(\text{NO}_2)$                  |
| 30                                        | 478.3              | 478                  | B3                         |                                                                       |                                     |                            |                                                              |
| 31                                        | 478.4              | 478                  | A                          |                                                                       |                                     |                            |                                                              |
| 32                                        | 480.3              | 478                  | B2                         |                                                                       |                                     |                            |                                                              |
| 33                                        | 588.5              | 590                  | A                          | NCH wagging +<br>NO <sub>2</sub> out of plane wagging                 | M13                                 | B2                         | NO <sub>2</sub> rocking $\rho(\text{NO}_2)$                  |
| 34                                        | 589.3              | 590                  | B3                         |                                                                       |                                     |                            |                                                              |
| 35                                        | 593.7              | 595                  | B2                         |                                                                       |                                     |                            |                                                              |
| 36                                        | 595.2              | 597                  | B1                         |                                                                       |                                     |                            |                                                              |
| 37                                        | 646.6              | 646                  | A                          | CN stretching + NO <sub>2</sub> scissor                               | M12                                 | A1                         | NO <sub>2</sub> symmetric bending<br>$\delta_s(\text{NO}_2)$ |
| 38                                        | 650.0              | 648                  | B2                         |                                                                       |                                     |                            |                                                              |
| 39                                        | 650.5              | 648                  | B3                         |                                                                       |                                     |                            |                                                              |
| 40                                        | 652.9              | 653                  | B1                         |                                                                       |                                     |                            |                                                              |
| 41                                        | 909.5              | 910                  | B3                         | CN stretching + NO <sub>2</sub> bending                               | M11                                 | A1                         | CN stretching $\nu(\text{CN})$                               |
| 42                                        | 909.6              | 910                  | B1                         |                                                                       |                                     |                            |                                                              |
| 43                                        | 910.1              | 910                  | A                          |                                                                       |                                     |                            |                                                              |
| 44                                        | 910.6              | 910                  | B2                         |                                                                       |                                     |                            |                                                              |
| 45                                        | 1078.0             | 1080                 | B1                         | CH <sub>3</sub> twisting +<br>NO <sub>2</sub> asymmetrical stretching | M10                                 | B1                         | CH <sub>3</sub> rocking $\rho(\text{CH}_3)$                  |
| 46                                        | 1079.2             | 1080                 | B2                         |                                                                       |                                     |                            |                                                              |
| 47                                        | 1080.2             | 1080                 | A                          |                                                                       |                                     |                            |                                                              |
| 48                                        | 1081.6             | 1086                 | B3                         |                                                                       |                                     |                            |                                                              |

Continued.

| Crystalline nitromethane ( $P2_12_12_1$ ) |                    |                      |                            |                                                                                      | Molecular nitromethane ( $C_{2v}$ ) |                            |                                                                    |
|-------------------------------------------|--------------------|----------------------|----------------------------|--------------------------------------------------------------------------------------|-------------------------------------|----------------------------|--------------------------------------------------------------------|
| No.                                       | Harmonic frequency | Anharmonic frequency | Irreducible representation | Assignment                                                                           | Mode                                | Irreducible representation | Assignment                                                         |
| 49                                        | 1085.4             | 1086                 | A                          | NCH deformation                                                                      | M9                                  | B2                         | CH <sub>3</sub> rocking $\rho(\text{CH}_3)$                        |
| 50                                        | 1086.6             | 1088                 | B3                         |                                                                                      |                                     |                            |                                                                    |
| 51                                        | 1087.6             | 1088                 | B1                         |                                                                                      |                                     |                            |                                                                    |
| 52                                        | 1092.7             | 1093                 | B2                         |                                                                                      |                                     |                            |                                                                    |
| 53                                        | 1338.3             | 1340                 | B3                         | CH <sub>3</sub> wagging +<br>NO <sub>2</sub> symmetric stretching +<br>CN stretching | M8                                  | A1                         | CH <sub>3</sub> symmetric bending<br>$\delta_s(\text{CH}_3)$       |
| 54                                        | 1340.9             | 1343                 | A                          |                                                                                      |                                     |                            |                                                                    |
| 55                                        | 1341.1             | 1343                 | B2                         |                                                                                      |                                     |                            |                                                                    |
| 56                                        | 1341.7             | 1343                 | B1                         |                                                                                      |                                     |                            |                                                                    |
| 57                                        | 1381.3             | 1383                 | A                          | CH <sub>3</sub> deformation +<br>NO <sub>2</sub> symmetric stretching                | M7                                  | A1                         | NO <sub>2</sub> symmetric stretching<br>$\nu_s(\text{NO}_2)$       |
| 58                                        | 1384.9             | 1388                 | B3                         |                                                                                      |                                     |                            |                                                                    |
| 59                                        | 1394.5             | 1396                 | B2                         |                                                                                      |                                     |                            |                                                                    |
| 60                                        | 1391.6             | 1394                 | B1                         |                                                                                      |                                     |                            |                                                                    |
| 61                                        | 1391.5             | 1394                 | A                          | CH <sub>3</sub> deformation +<br>NO <sub>2</sub> symmetric stretching                | M6                                  | B1                         | CH <sub>3</sub> asymmetrical bending<br>$\delta_{as}(\text{CH}_3)$ |
| 62                                        | 1395.3             | 1399                 | B3                         |                                                                                      |                                     |                            |                                                                    |
| 63                                        | 1402.1             | 1409                 | B1                         |                                                                                      |                                     |                            |                                                                    |
| 64                                        | 1409.9             | 1414                 | B2                         |                                                                                      |                                     |                            |                                                                    |
| 65                                        | 1415.8             | 1419                 | A                          | CH <sub>3</sub> deformation +<br>NO <sub>2</sub> asymmetrical stretching             | M5                                  | B2                         | CH <sub>3</sub> asymmetrical bending<br>$\delta_{as}(\text{CH}_3)$ |
| 66                                        | 1416.1             | 1416                 | B2                         |                                                                                      |                                     |                            |                                                                    |
| 67                                        | 1425.5             | 1429                 | B3                         |                                                                                      |                                     |                            |                                                                    |
| 68                                        | 1435.0             | 1437                 | B1                         |                                                                                      |                                     |                            |                                                                    |
| 69                                        | 1532.6             | 1533                 | A                          | CH <sub>3</sub> wagging +<br>NO <sub>2</sub> asymmetrical stretching                 | M4                                  | B1                         | NO <sub>2</sub> asymmetrical stretching<br>$\nu_{as}(\text{NO}_2)$ |
| 70                                        | 1553.8             | 1554                 | B1                         |                                                                                      |                                     |                            |                                                                    |
| 71                                        | 1559.3             | 1556                 | B3                         |                                                                                      |                                     |                            |                                                                    |
| 72                                        | 1561.2             | 1564                 | B2                         |                                                                                      |                                     |                            |                                                                    |

Continued.

| Crystalline nitromethane ( $P2_12_12_1$ ) |                    |                      |                            |                                         | Molecular nitromethane ( $C_{2v}$ ) |                            |                                                                           |
|-------------------------------------------|--------------------|----------------------|----------------------------|-----------------------------------------|-------------------------------------|----------------------------|---------------------------------------------------------------------------|
| No.                                       | Harmonic frequency | Anharmonic frequency | Irreducible representation | Assignment                              | Mode                                | Irreducible representation | Assignment                                                                |
| 73                                        | 3003.6             | 3019                 | B3                         | CH <sub>3</sub> symmetric stretching    | M3                                  | A1                         | CH <sub>3</sub> symmetric stretching<br>$\nu_s(\text{CH}_3)$              |
| 74                                        | 3004.2             | 3021                 | A                          |                                         |                                     |                            |                                                                           |
| 75                                        | 3004.6             | 3021                 | B1                         |                                         |                                     |                            |                                                                           |
| 76                                        | 3005.9             | 3021                 | B2                         |                                         |                                     |                            |                                                                           |
| 77                                        | 3103.0             | 3118                 | B3                         | CH <sub>3</sub> asymmetrical stretching | M2                                  | B2                         | CH <sub>3</sub> asymmetrical stretching<br>$\nu_{\text{as}}(\text{CH}_3)$ |
| 78                                        | 3103.5             | 3118                 | A                          |                                         |                                     |                            |                                                                           |
| 79                                        | 3103.9             | 3118                 | B1                         |                                         |                                     |                            |                                                                           |
| 80                                        | 3104.7             | 3118                 | B2                         |                                         |                                     |                            |                                                                           |
| 81                                        | 3151.9             | 3166                 | A                          | CH <sub>3</sub> asymmetrical stretching | M1                                  | B1                         | CH <sub>3</sub> asymmetrical stretching<br>$\nu_{\text{as}}(\text{CH}_3)$ |
| 82                                        | 3152.0             | 3166                 | B3                         |                                         |                                     |                            |                                                                           |
| 83                                        | 3152.7             | 3166                 | B2                         |                                         |                                     |                            |                                                                           |
| 84                                        | 3153.6             | 3169                 | B1                         |                                         |                                     |                            |                                                                           |

<sup>a</sup> Ref. J. Chem. Phys. 108, 7350 (1998).

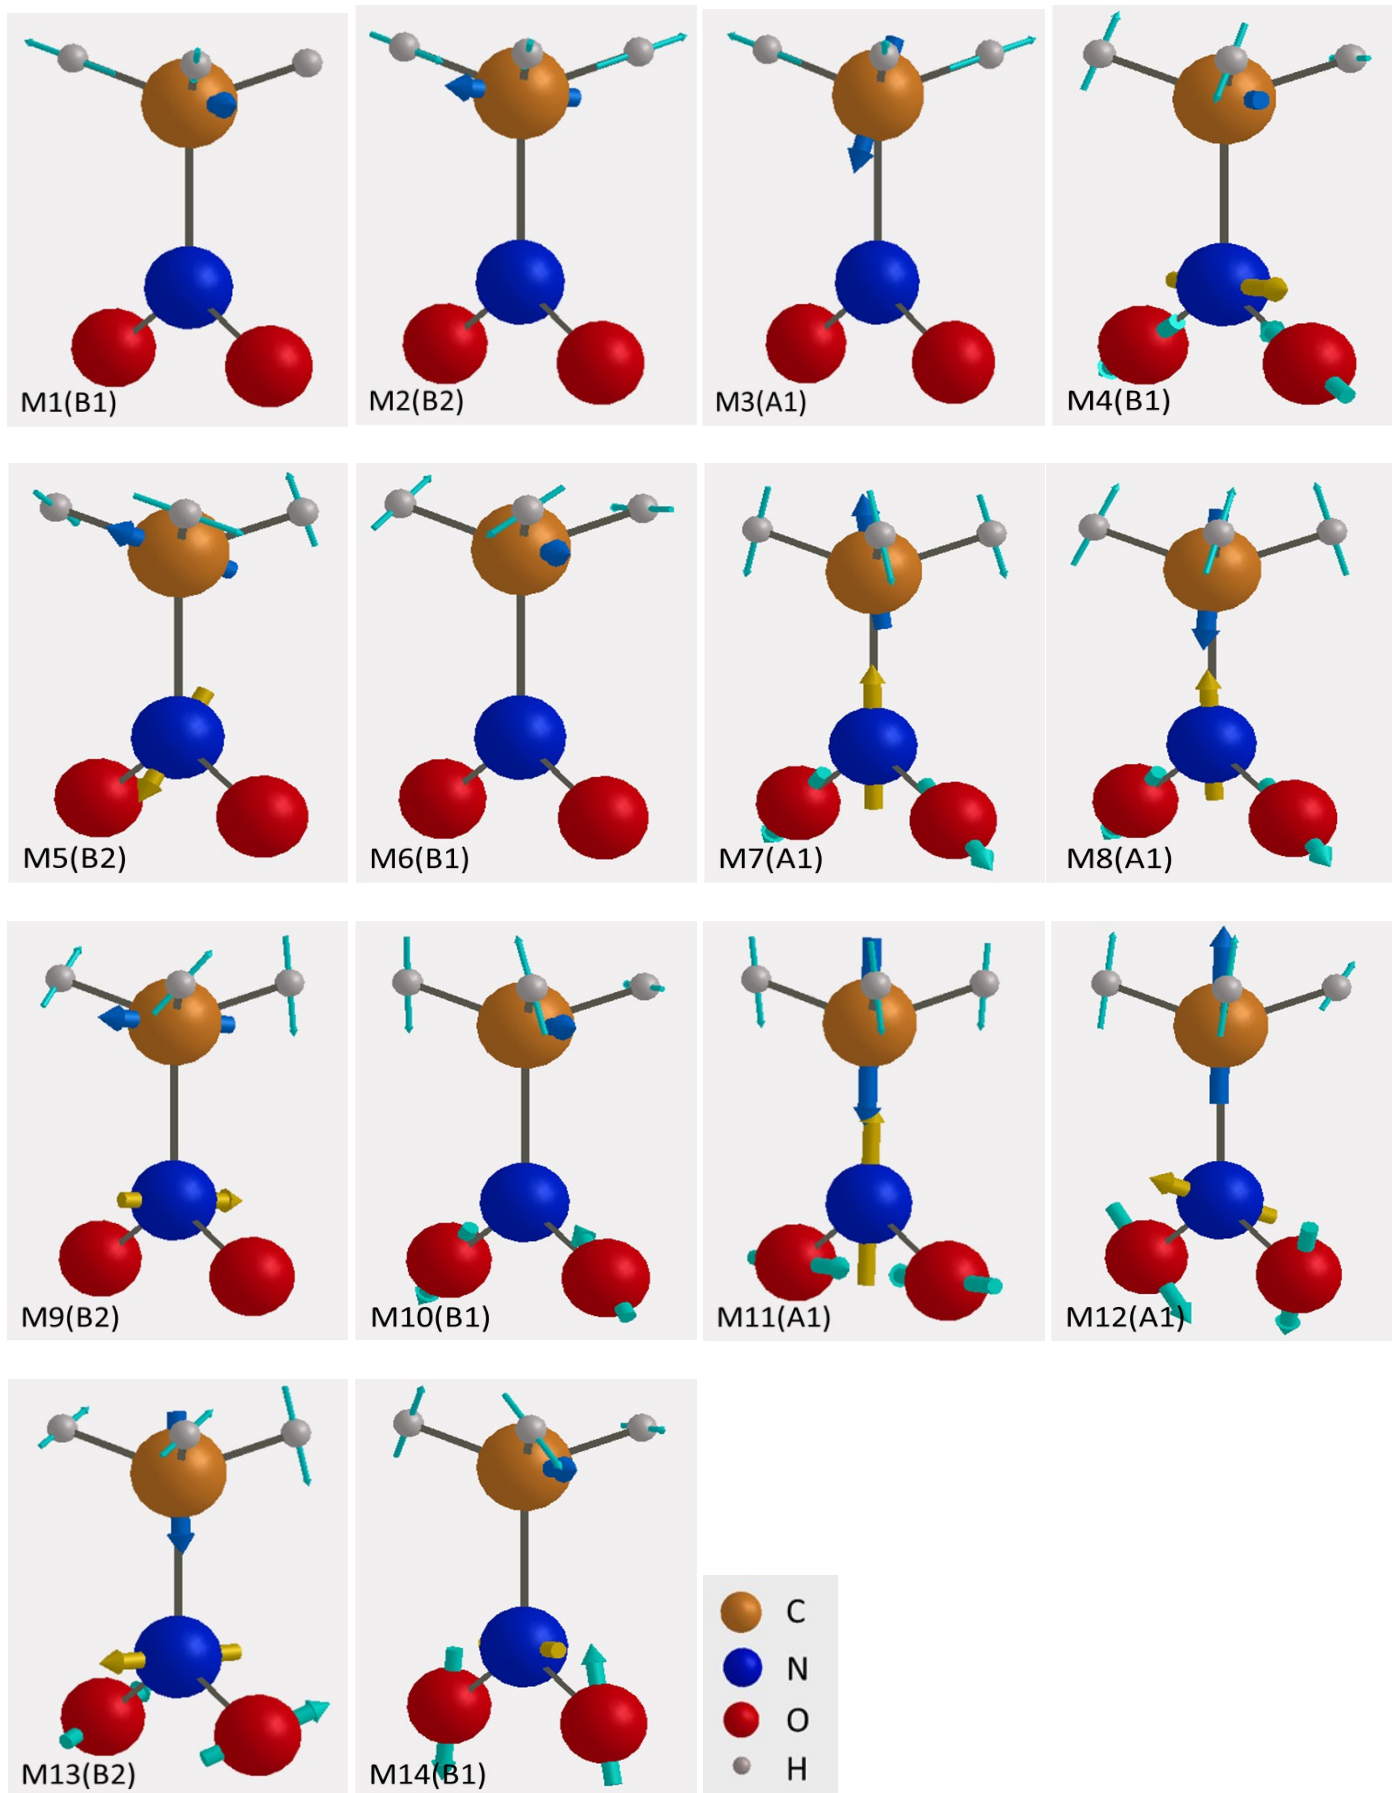

Figure S1. Graphical depictions of the 14 intramolecular vibrations.



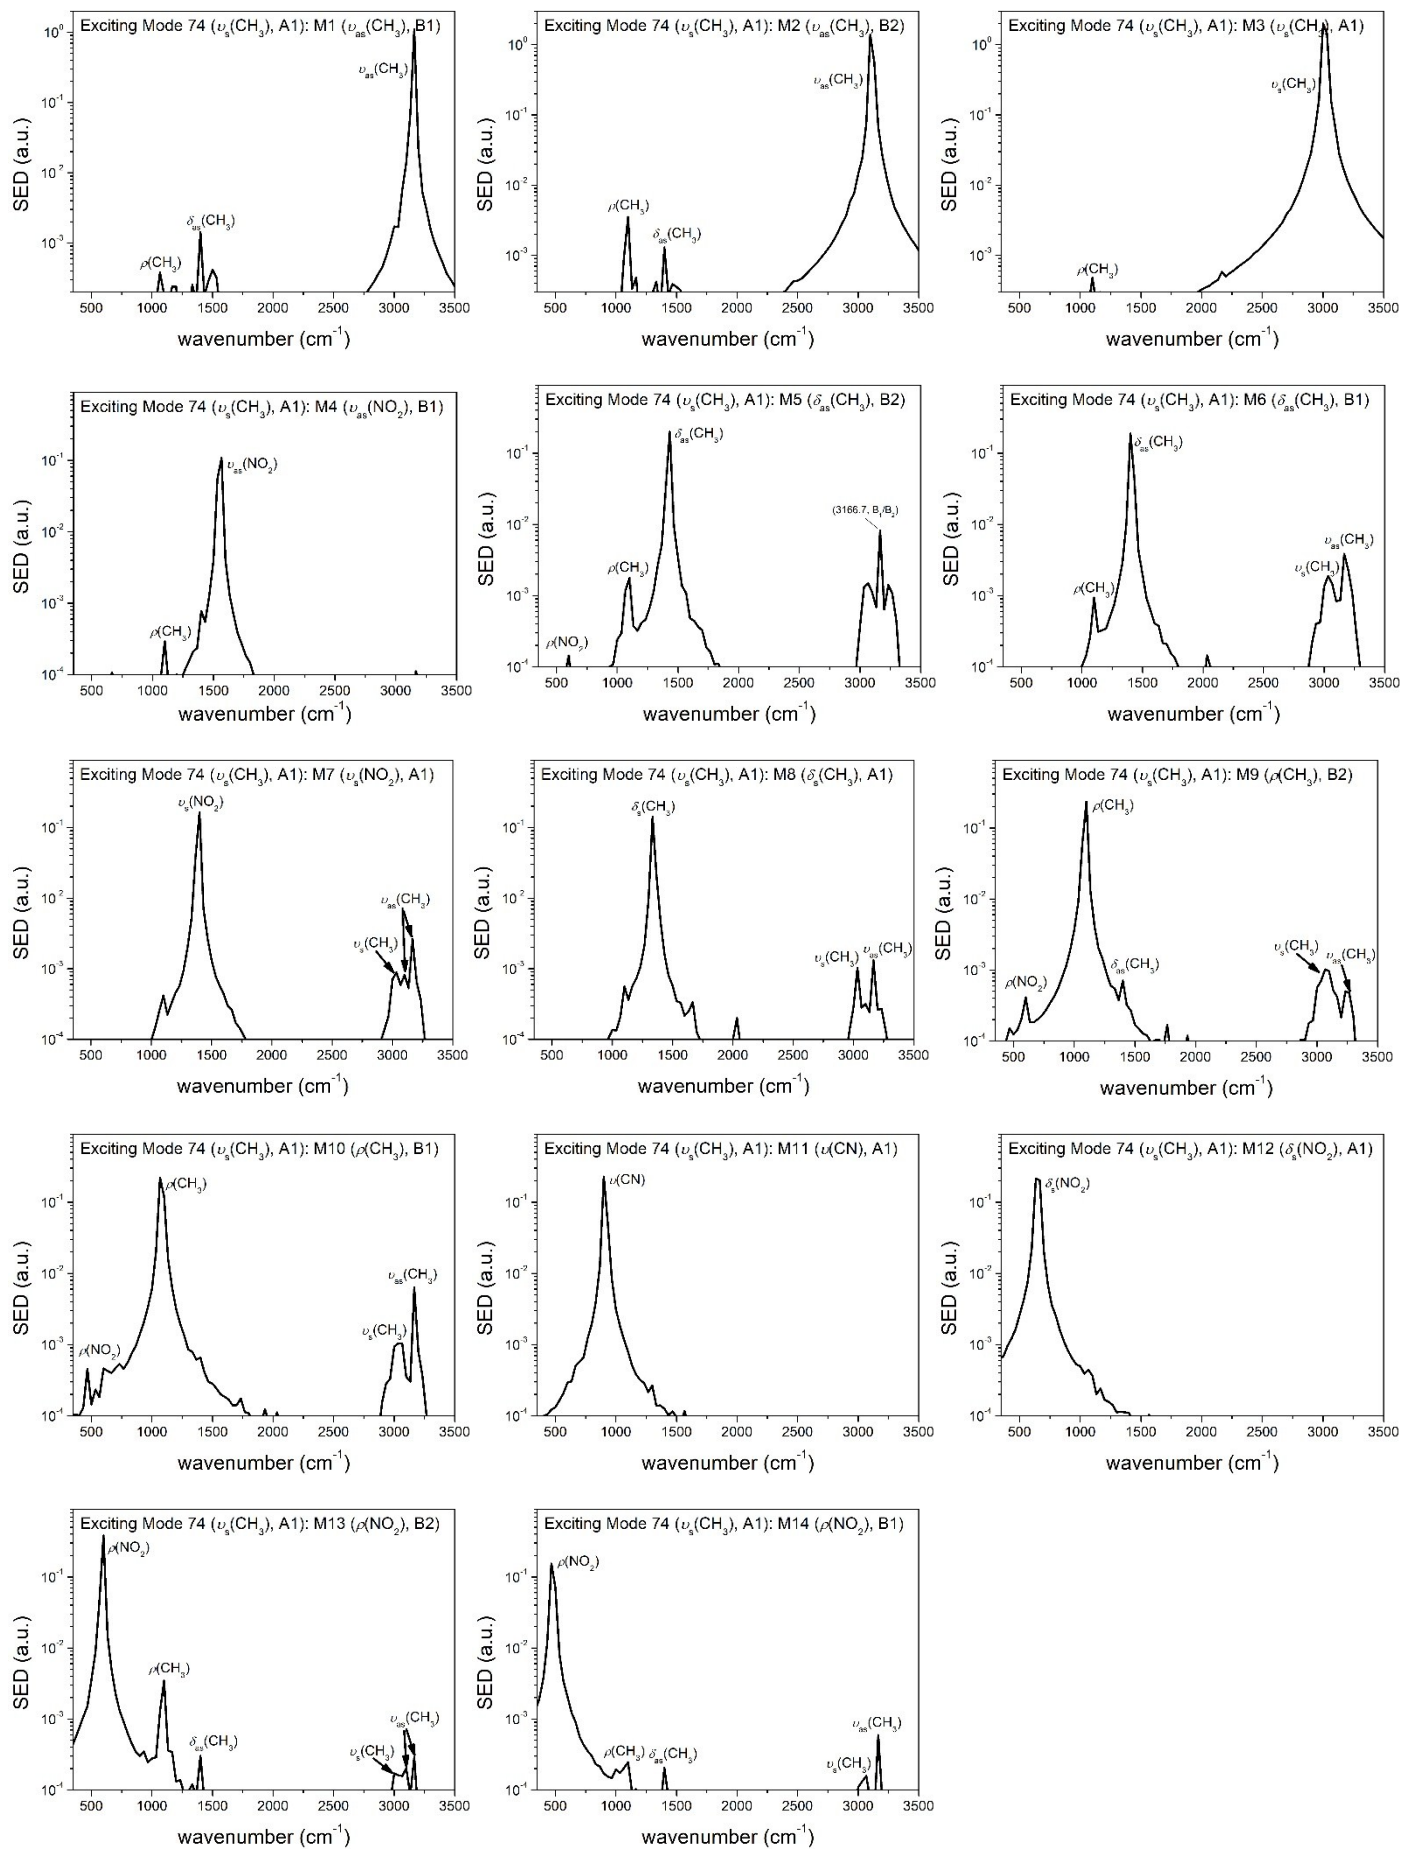

Figure S2. SED spectra between 11 and 12 ps of intramolecular mode after exciting mode 74 (C-H symmetric stretching).

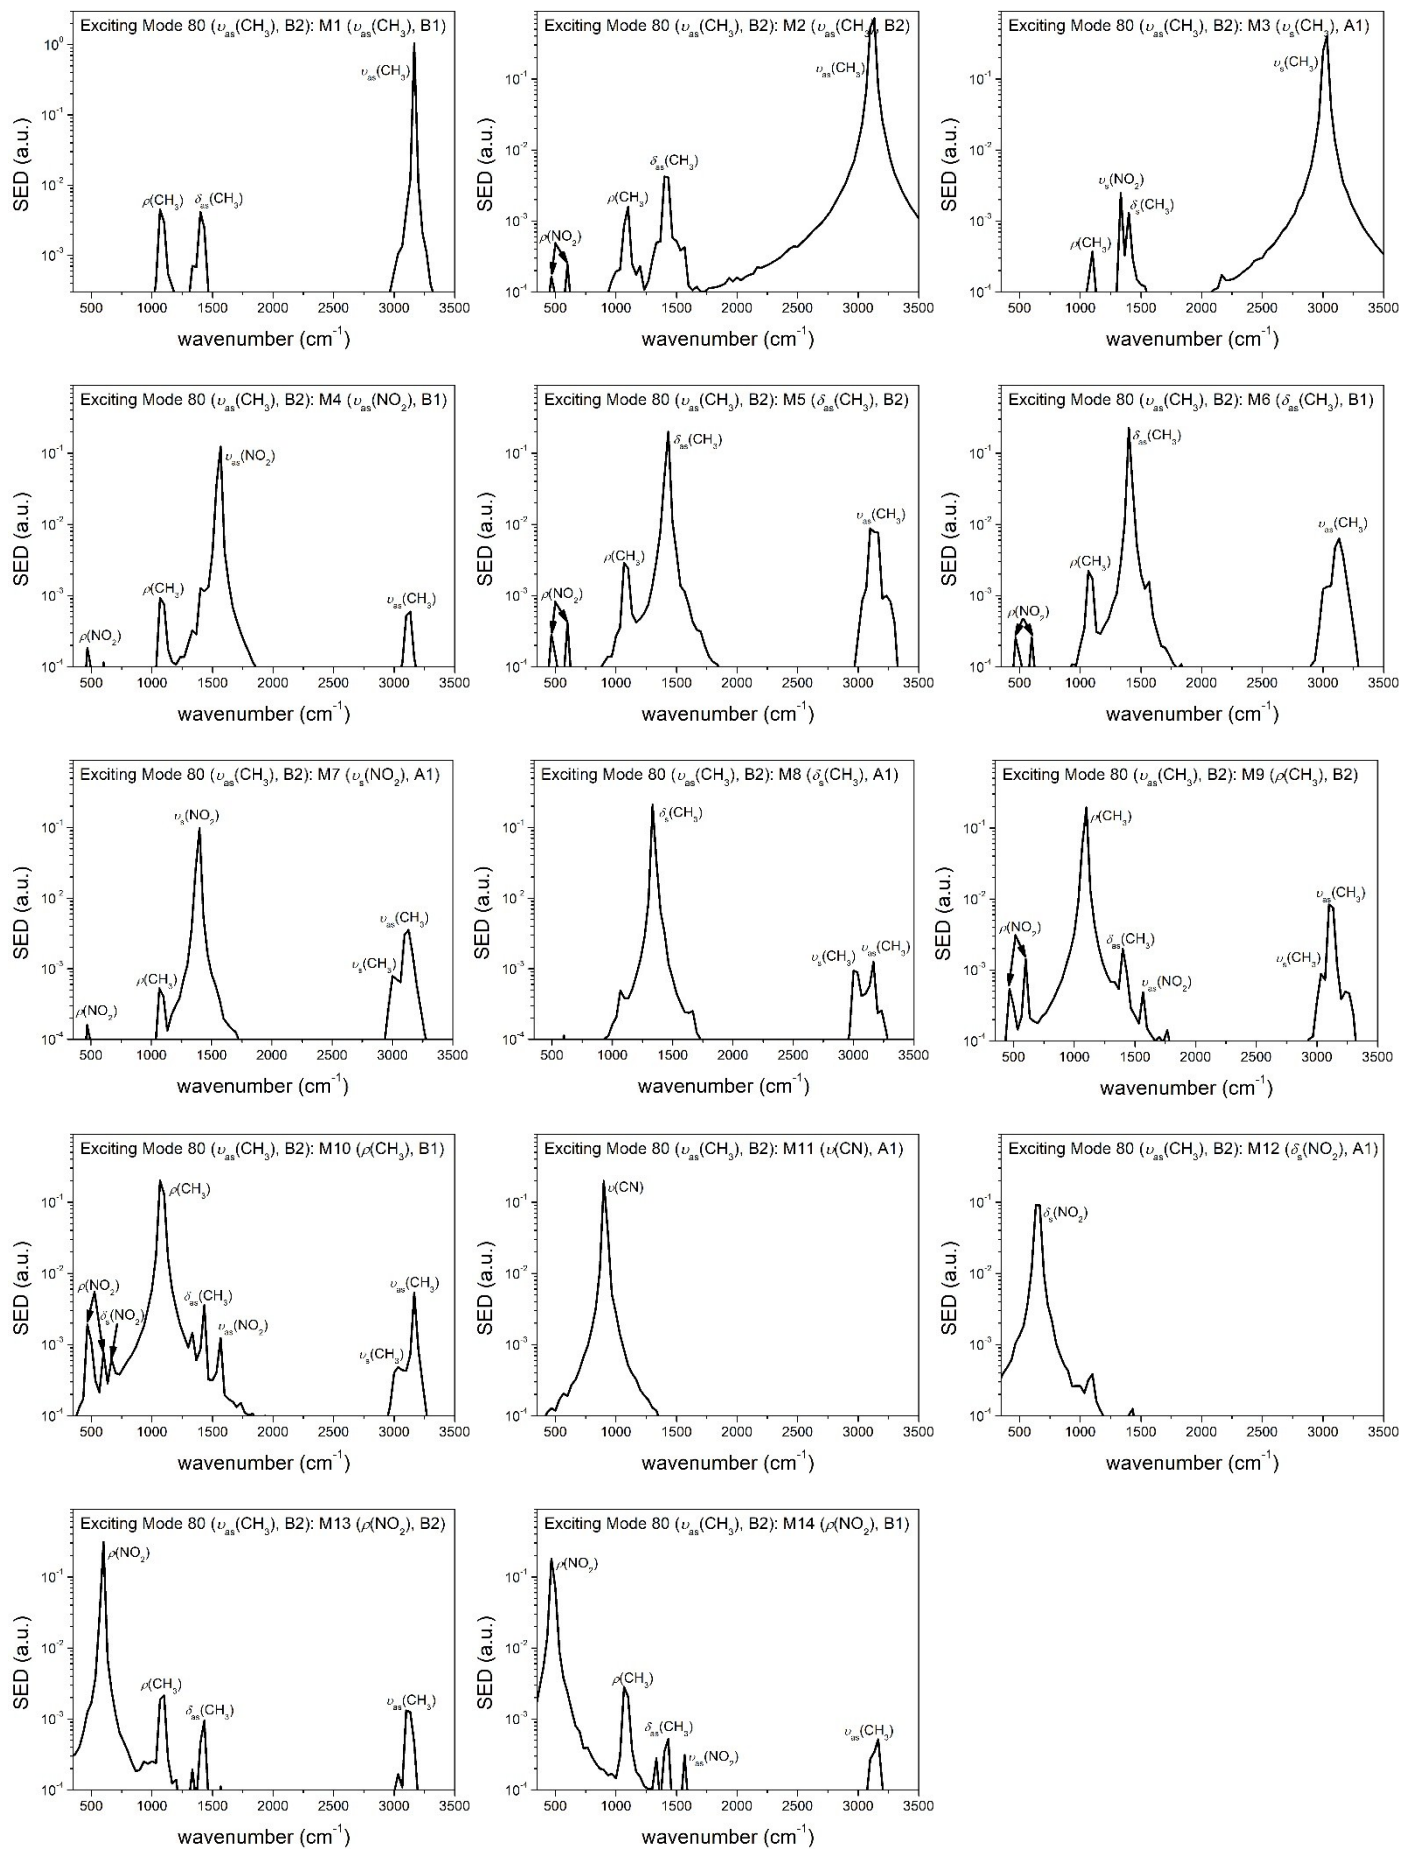

Figure S3. SED spectra between 11 and 12 ps of intramolecular mode after exciting mode 80 (C-H asymmetric stretching).

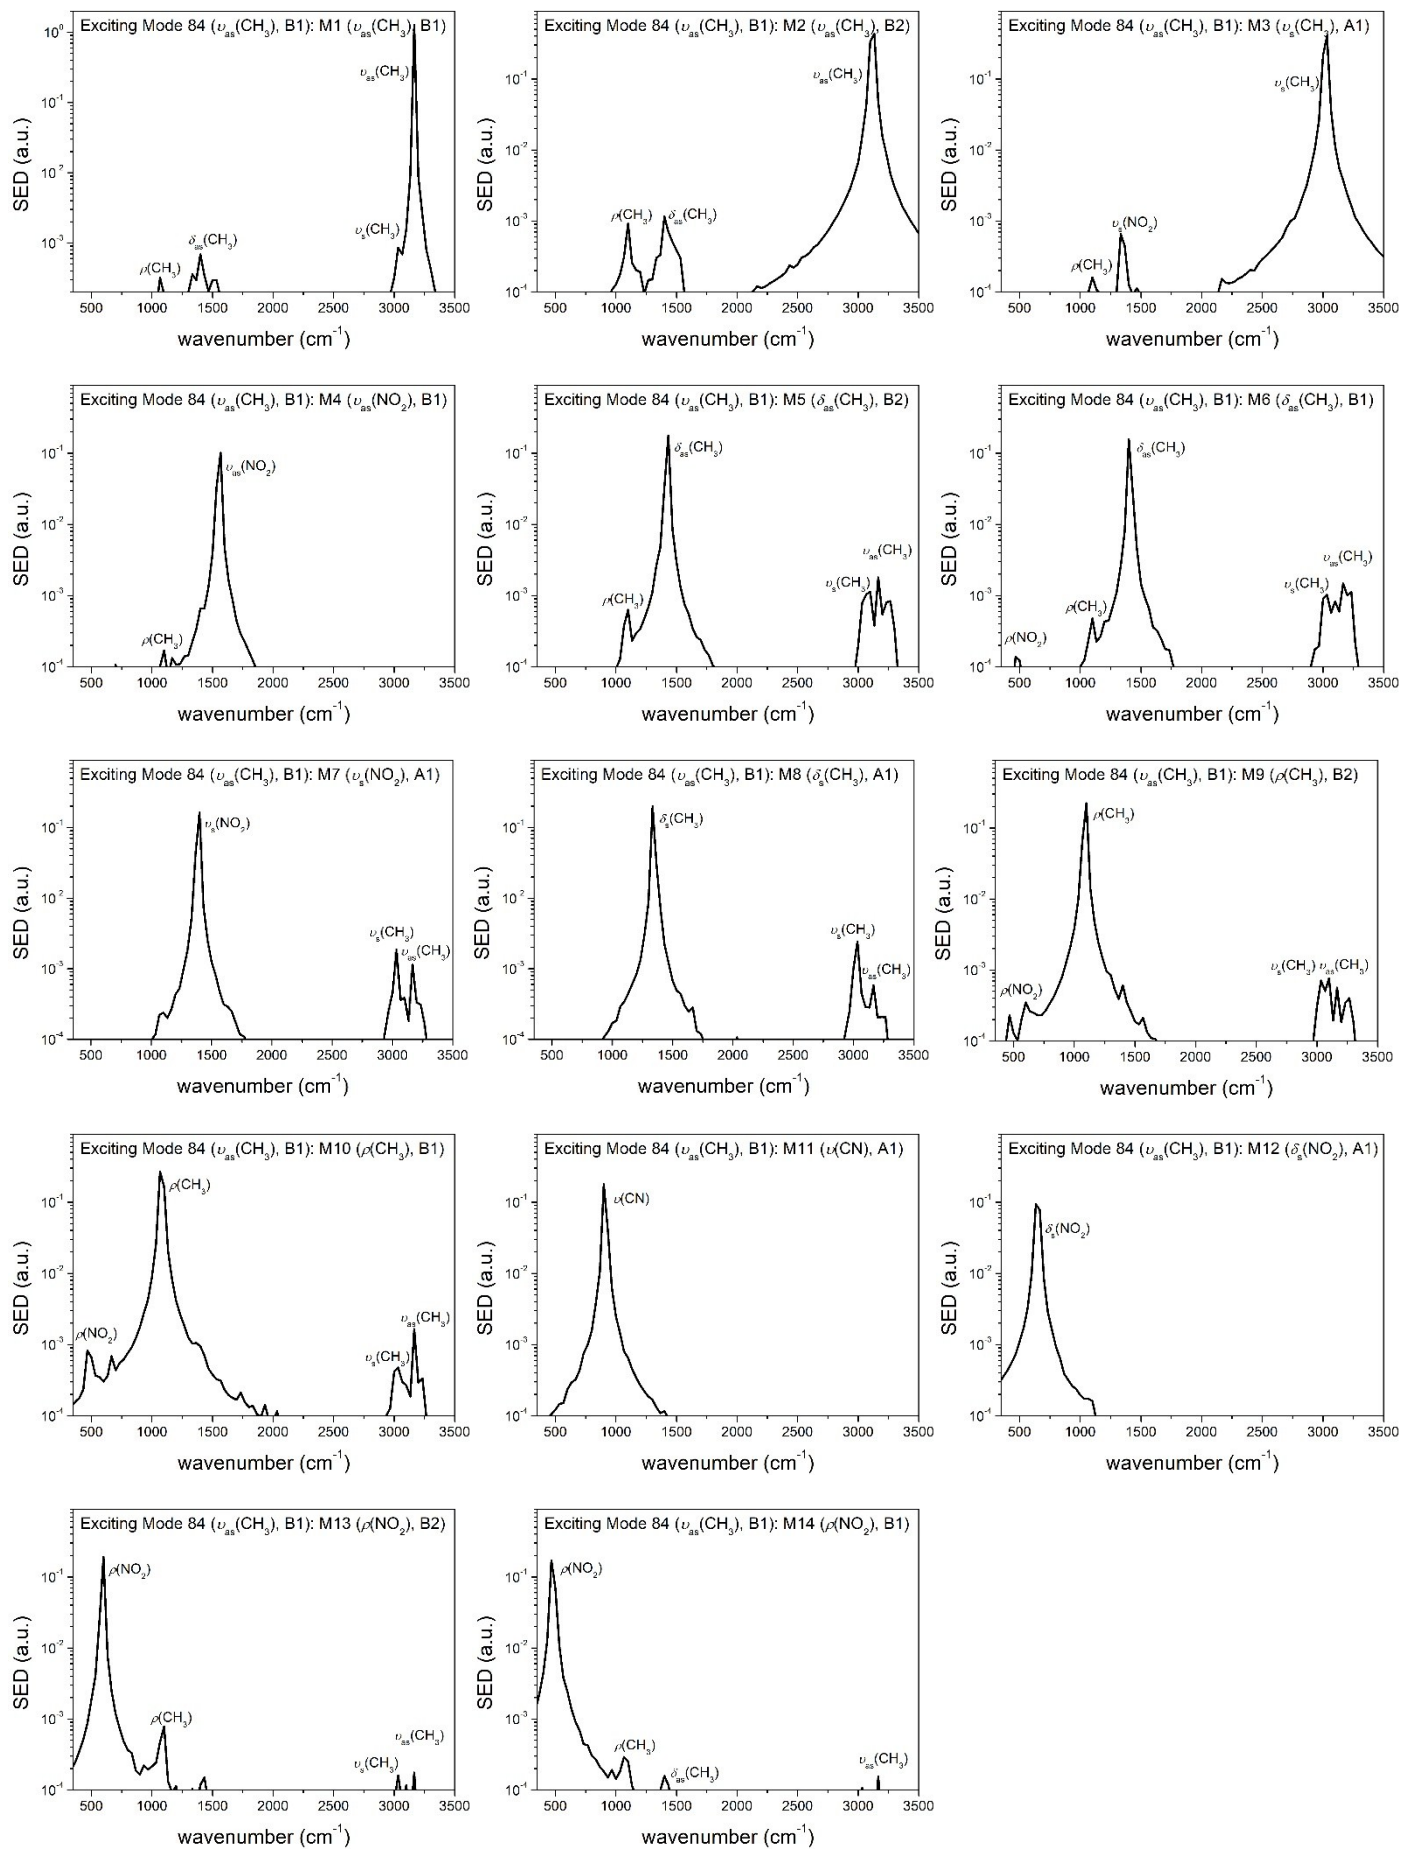

Figure S4. SED spectra between 11 and 12 ps of intramolecular mode after exciting mode 84 (C-H asymmetric stretching).

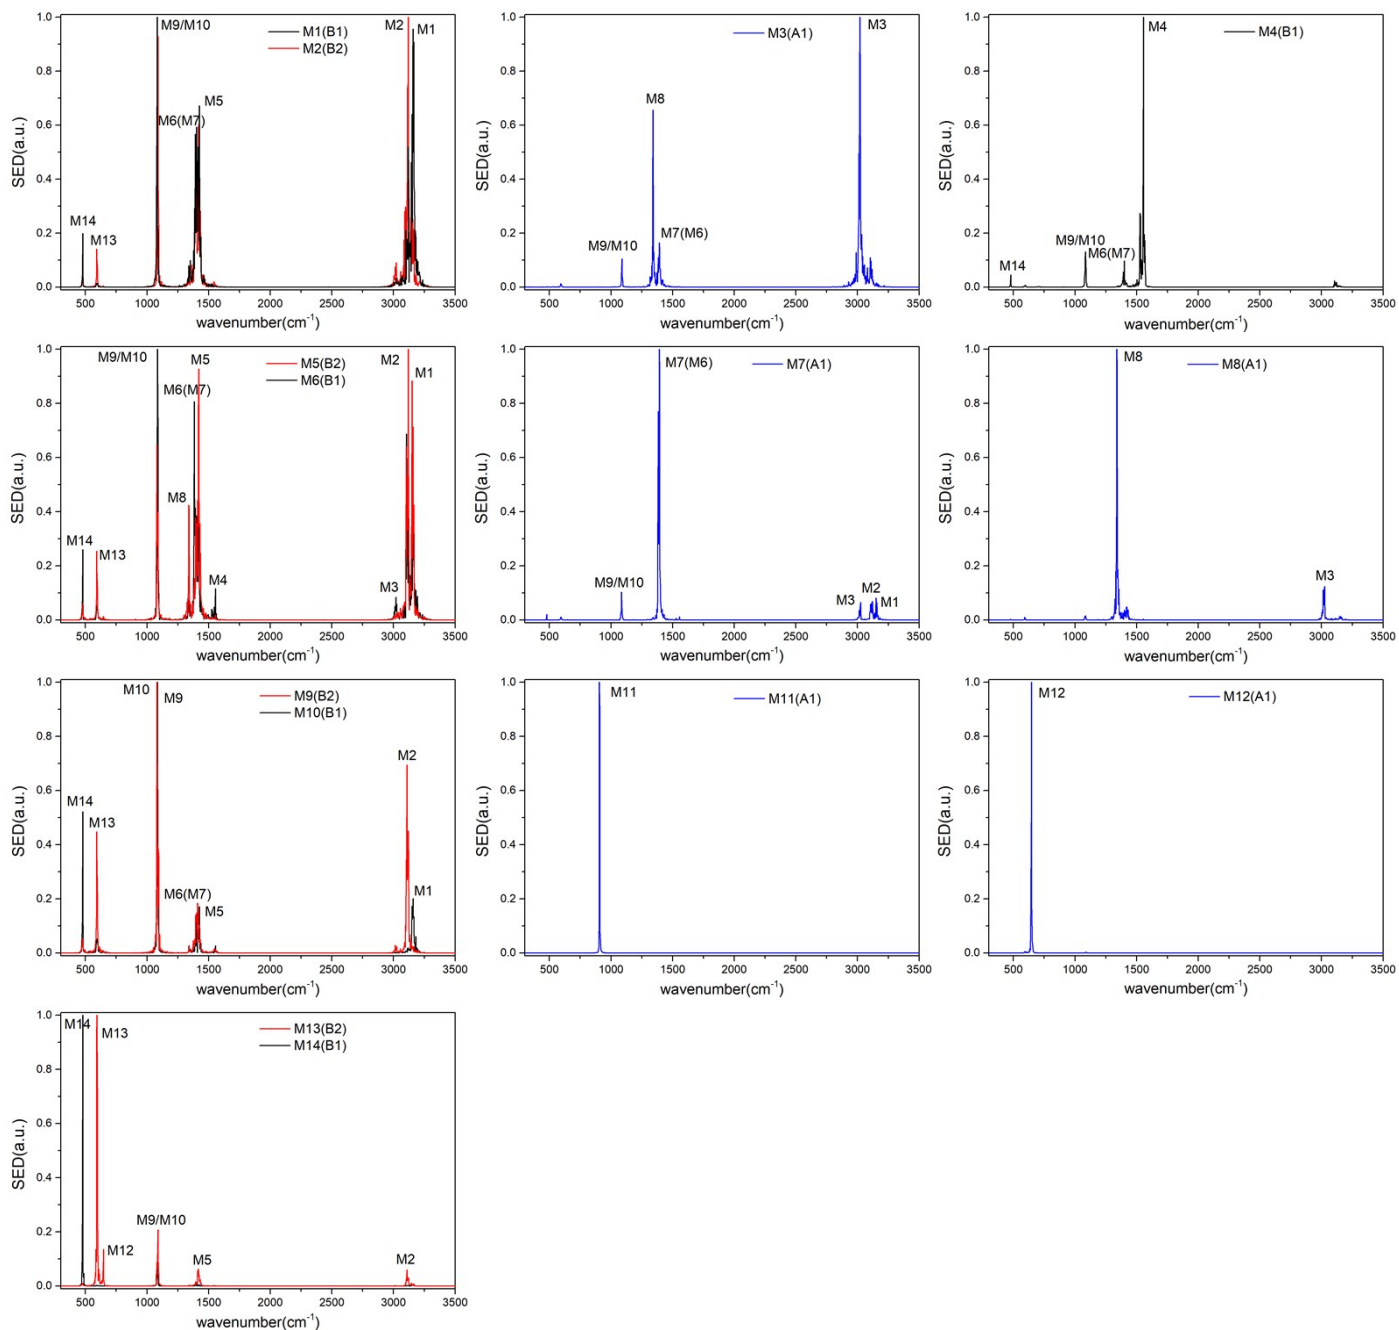

Figure S5. SED spectra in 12 ps of intramolecular mode at 100 K without selective excitation. The lines were colored in black, red and blue according to their symmetries B1, B2 and A1.

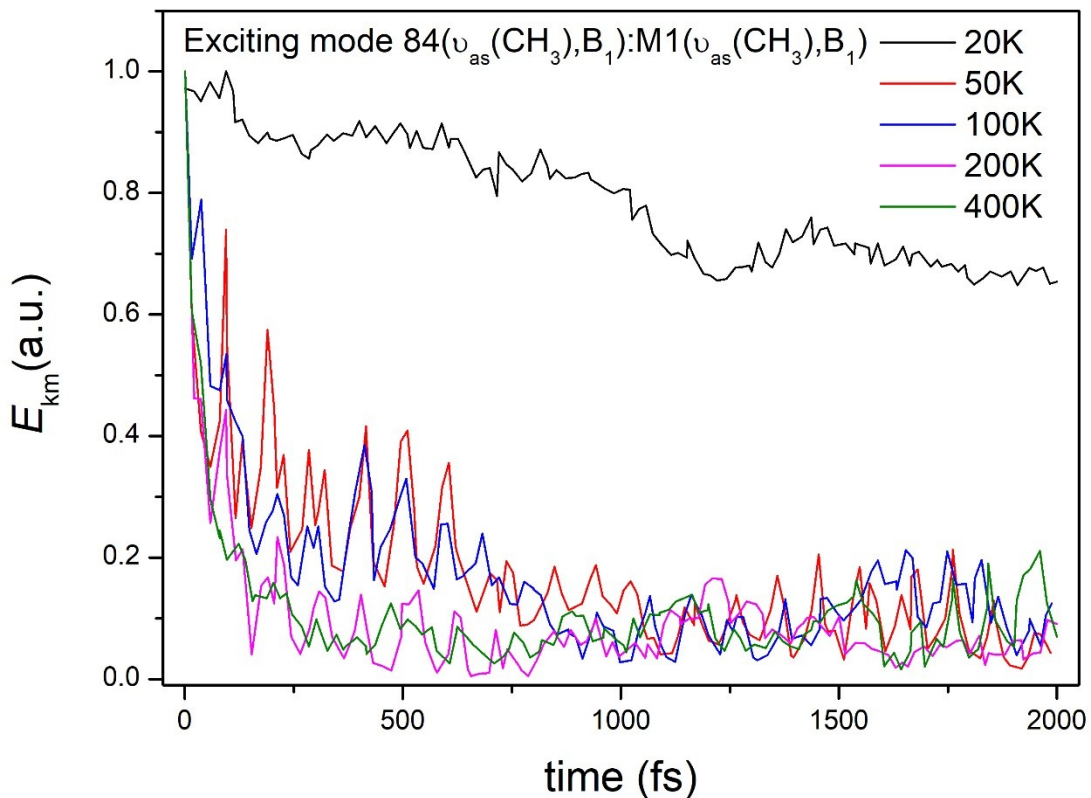

Figure S6. Evolution of kinetic energy for intramolecular mode M1 ( $\nu_{as}(\text{CH}_3)$ ) after exciting mode 84 (C-H asymmetric stretching).

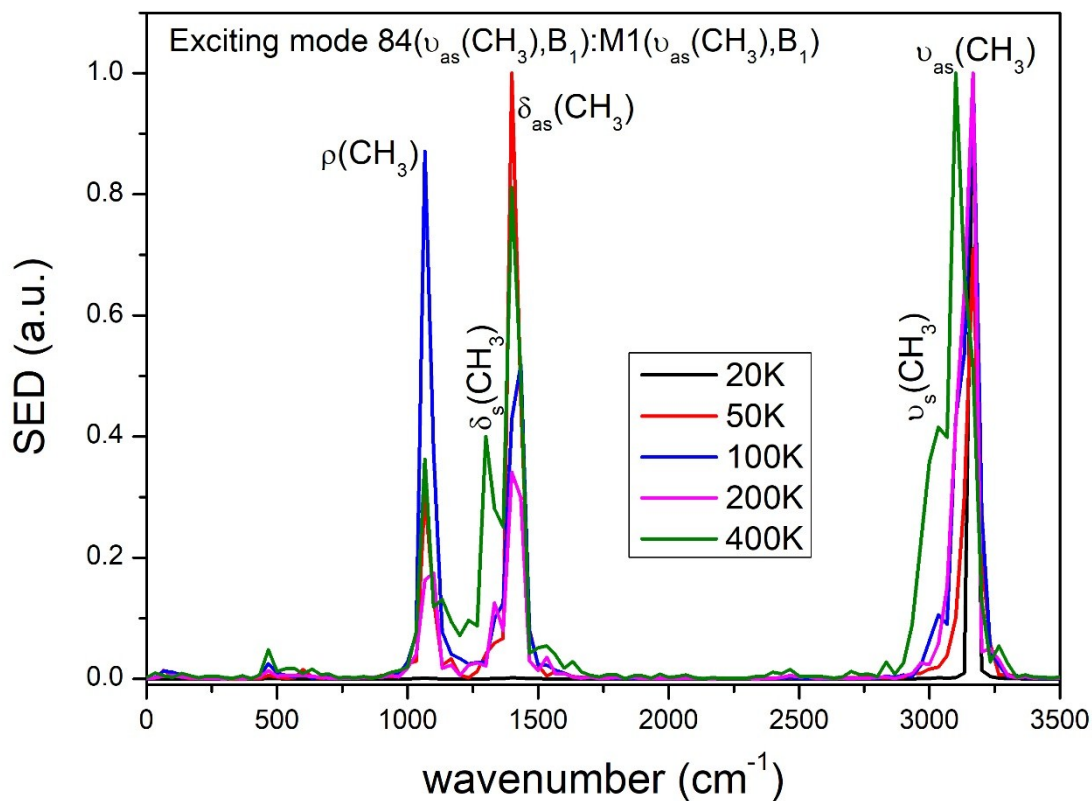

Figure S7. SED spectra of intramolecular mode M1 ( $\nu_{as}(\text{CH}_3)$ ) for the first 1 ps after exciting mode 84 (C-H asymmetric stretching).
